# Supplementary material for: Long-wavelength native-SAD phasing: opportunities and challenges
Source: PubMed Central journal article supplement (PMC6503925; doi:10.1107/s2052252519002756), 2019-04-01
Supplement: m-06-00373-sup1.pdf [file m-06-00373-sup1.pdf]

# IUCrJ

**Volume 6 (2019)**

**Supporting information for article:**

**Long-wavelength native-SAD phasing: opportunities and challenges**

**Shibom Basu, Vincent Olieric, Filip Leonarski, Naohiro Matsugaki, Yoshiaki Kawano, Tomizaki Takashi, Chia-Ying Huang, Yusuke Yamada, Laura Vera, Natacha Olieric, Jerome Basquin, Justyna A. Wojdyla, Kay Diederichs, Masaki Yamamoto and Meitian Wang**

**Table S1** Data processing statistics of  $9 \times 360^\circ$  T<sub>2</sub>R-TTL datasets collected at 1.9 Å.

| $d_{\min}$ | Nrefl   | Nunique | Npossible | Completeness | R <sub>meas</sub> | $\langle I/\sigma \rangle$ | CC <sub>1/2</sub> | CC <sub>1/2</sub> anom |
|------------|---------|---------|-----------|--------------|-------------------|----------------------------|-------------------|------------------------|
| 13.19      | 67390   | 1323    | 1352      | 97.90%       | 5.90%             | 93.89                      | 100.00%           | 91%                    |
| 9.33       | 157926  | 2470    | 2470      | 100.00%      | 4.60%             | 106.38                     | 100.00%           | 85%                    |
| 7.62       | 212206  | 3196    | 3196      | 100.00%      | 5.00%             | 92.99                      | 100.00%           | 80%                    |
| 6.60       | 253288  | 3754    | 3754      | 100.00%      | 6.40%             | 76.41                      | 100.00%           | 78%                    |
| 5.90       | 291131  | 4293    | 4293      | 100.00%      | 7.60%             | 64.65                      | 100.00%           | 71%                    |
| 5.39       | 322369  | 4738    | 4738      | 100.00%      | 7.90%             | 63.97                      | 100.00%           | 64%                    |
| 4.99       | 347950  | 5116    | 5116      | 100.00%      | 7.90%             | 66.56                      | 100.00%           | 54%                    |
| 4.66       | 373662  | 5543    | 5543      | 100.00%      | 7.70%             | 70.05                      | 100.00%           | 42%                    |
| 4.40       | 394151  | 5856    | 5856      | 100.00%      | 7.90%             | 69.19                      | 100.00%           | 37%                    |
| 4.17       | 418549  | 6215    | 6215      | 100.00%      | 9.10%             | 60.76                      | 100.00%           | 34%                    |
| 3.98       | 439305  | 6548    | 6548      | 100.00%      | 10.20%            | 54.68                      | 99.90%            | 25%                    |
| 3.81       | 458093  | 6851    | 6851      | 100.00%      | 11.70%            | 48.57                      | 99.90%            | 21%                    |
| 3.66       | 476653  | 7129    | 7129      | 100.00%      | 13.50%            | 42.36                      | 99.90%            | 19%                    |
| 3.53       | 470000  | 7369    | 7369      | 100.00%      | 16.10%            | 35.08                      | 99.90%            | 13%                    |
| 3.41       | 436082  | 7651    | 7651      | 100.00%      | 18.80%            | 27.87                      | 99.80%            | 10%                    |
| 3.30       | 465054  | 7974    | 7974      | 100.00%      | 24.70%            | 22.36                      | 99.70%            | 10%                    |
| 3.20       | 504794  | 8200    | 8200      | 100.00%      | 31.00%            | 19.04                      | 99.60%            | 8%                     |
| 3.11       | 526570  | 8408    | 8408      | 100.00%      | 39.90%            | 15.16                      | 99.40%            | 8%                     |
| 3.03       | 512335  | 8677    | 8677      | 100.00%      | 49.50%            | 11.92                      | 99.00%            | 5%                     |
| 2.95       | 481942  | 8938    | 8936      | 100.00%      | 60.60%            | 9.14                       | 98.20%            | 0%                     |
| total      | 7609450 | 120249  | 120276    | 100.00%      | 11.70%            | 43.03                      | 100.00%           | 28%                    |

**Table S2** Data processing statistics of  $14 \times 360^\circ$  T<sub>2</sub>R-TTL datasets collected at 2.7 Å.

| $d_{\min}$ | Nrefl    | Nunique | Npossible | Completeness | R <sub>meas</sub> | $\langle I/\sigma \rangle$ | CC <sub>1/2</sub> | CC <sub>1/2anom</sub> |
|------------|----------|---------|-----------|--------------|-------------------|----------------------------|-------------------|-----------------------|
| 13.19      | 116993   | 1319    | 1347      | 97.90%       | 9.30%             | 99.39                      | 99.90%            | 95%                   |
| 9.33       | 256445   | 2461    | 2461      | 100.00%      | 6.70%             | 108.56                     | 100.00%           | 95%                   |
| 7.62       | 338294   | 3188    | 3188      | 100.00%      | 6.40%             | 94.42                      | 100.00%           | 94%                   |
| 6.60       | 398814   | 3747    | 3747      | 100.00%      | 7.80%             | 77.36                      | 100.00%           | 93%                   |
| 5.90       | 453642   | 4266    | 4266      | 100.00%      | 9.30%             | 65.07                      | 100.00%           | 90%                   |
| 5.39       | 500871   | 4720    | 4720      | 100.00%      | 9.50%             | 64.49                      | 100.00%           | 87%                   |
| 4.99       | 526405   | 5095    | 5095      | 100.00%      | 9.10%             | 66.48                      | 100.00%           | 83%                   |
| 4.66       | 500661   | 5525    | 5525      | 100.00%      | 8.40%             | 66.46                      | 100.00%           | 75%                   |
| 4.40       | 568332   | 5834    | 5834      | 100.00%      | 8.50%             | 67.99                      | 100.00%           | 72%                   |
| 4.17       | 545767   | 6186    | 6186      | 100.00%      | 10.10%            | 57.28                      | 100.00%           | 65%                   |
| 3.98       | 591193   | 6512    | 6512      | 100.00%      | 11.80%            | 51.52                      | 99.90%            | 58%                   |
| 3.81       | 643498   | 6846    | 6846      | 100.00%      | 14.40%            | 45.68                      | 99.90%            | 51%                   |
| 3.66       | 670828   | 7081    | 7081      | 100.00%      | 18.00%            | 38.37                      | 99.90%            | 45%                   |
| 3.53       | 698849   | 7389    | 7389      | 100.00%      | 24.60%            | 30.15                      | 99.80%            | 36%                   |
| 3.41       | 712989   | 7604    | 7604      | 100.00%      | 34.00%            | 22.68                      | 99.70%            | 30%                   |
| 3.30       | 738075   | 7906    | 7906      | 100.00%      | 50.30%            | 15.77                      | 99.30%            | 31%                   |
| 3.20       | 760936   | 8168    | 8168      | 100.00%      | 71.00%            | 10.96                      | 98.70%            | 30%                   |
| 3.11       | 787313   | 8457    | 8457      | 100.00%      | 98.60%            | 7.16                       | 96.40%            | 25%                   |
| 3.03       | 704169   | 8581    | 8582      | 100.00%      | 129.70%           | 4.32                       | 91.50%            | 28%                   |
| 2.95       | 625401   | 8835    | 8887      | 99.40%       | 176.30%           | 2.41                       | 75.50%            | 18%                   |
| total      | 11139475 | 119720  | 119801    | 99.90%       | 14.60%            | 39.06                      | 100.00%           | 57%                   |

**Table S3** Data processing statistics of 2.7 Å datasets from spherical lysozyme crystals

50 μm

| $d_{\min}$ | Nrefl | Nunique | Npossible | Completeness | $R_{\text{meas}}$ | $\langle I/\sigma \rangle$ | $CC_{1/2}$ | $CC_{1/2\text{anom}}$ |
|------------|-------|---------|-----------|--------------|-------------------|----------------------------|------------|-----------------------|
| 7.27       | 2080  | 302     | 313       | 96.50%       | 2.60%             | 78.74                      | 99.90%     | 98%                   |
| 5.14       | 3944  | 564     | 572       | 98.60%       | 2.60%             | 65.13                      | 100.00%    | 95%                   |
| 4.20       | 5309  | 733     | 742       | 98.80%       | 2.30%             | 71.47                      | 100.00%    | 94%                   |
| 3.64       | 5452  | 768     | 880       | 87.30%       | 2.40%             | 67.33                      | 100.00%    | 86%                   |
| 3.25       | 5231  | 858     | 1005      | 85.40%       | 2.80%             | 53.79                      | 99.90%     | 83%                   |
| 2.97       | 5591  | 857     | 1104      | 77.60%       | 3.20%             | 45.08                      | 99.90%     | 80%                   |
| 2.75       | 5691  | 851     | 1194      | 71.30%       | 3.60%             | 38.59                      | 99.90%     | 77%                   |
| 2.57       | 4609  | 788     | 1287      | 61.20%       | 4.50%             | 29.77                      | 99.90%     | 76%                   |
| 2.42       | 5030  | 790     | 1405      | 56.20%       | 4.90%             | 29.33                      | 99.80%     | 77%                   |
| 2.30       | 4732  | 759     | 1398      | 54.30%       | 5.50%             | 25.42                      | 99.80%     | 63%                   |
| total      | 47669 | 7270    | 9900      | 73.40%       | 2.90%             | 47.89                      | 100.00%    | 85%                   |

100 μm

| $d_{\min}$ | Nrefl | Nunique | Npossible | Completeness | $R_{\text{meas}}$ | $\langle I/\sigma \rangle$ | $CC_{1/2}$ | $CC_{1/2\text{anom}}$ |
|------------|-------|---------|-----------|--------------|-------------------|----------------------------|------------|-----------------------|
| 7.27       | 2000  | 295     | 310       | 95.20%       | 2.50%             | 86.57                      | 99.90%     | 99%                   |
| 5.14       | 3951  | 568     | 575       | 98.80%       | 2.40%             | 74.28                      | 100.00%    | 97%                   |
| 4.20       | 5313  | 732     | 742       | 98.70%       | 2.10%             | 81.4                       | 100.00%    | 95%                   |
| 3.64       | 5427  | 764     | 876       | 87.20%       | 2.00%             | 77.8                       | 100.00%    | 89%                   |
| 3.25       | 5239  | 853     | 1009      | 84.50%       | 2.30%             | 63.69                      | 100.00%    | 88%                   |
| 2.97       | 5578  | 851     | 1096      | 77.60%       | 2.60%             | 54.62                      | 100.00%    | 88%                   |
| 2.75       | 5707  | 851     | 1199      | 71.00%       | 2.90%             | 47.55                      | 99.90%     | 88%                   |
| 2.57       | 4546  | 773     | 1275      | 60.60%       | 3.60%             | 37.51                      | 99.90%     | 82%                   |
| 2.42       | 5063  | 794     | 1413      | 56.20%       | 3.80%             | 37.31                      | 99.90%     | 82%                   |
| 2.30       | 4723  | 756     | 1371      | 55.10%       | 4.50%             | 32.67                      | 99.80%     | 75%                   |
| total      | 47547 | 7237    | 9866      | 73.40%       | 2.50%             | 56.84                      | 100.00%    | 90%                   |

200 μm

| $d_{\min}$ | Nrefl | Nunique | Npossible | Completeness | $R_{\text{meas}}$ | $\langle I/\sigma \rangle$ | $CC_{1/2}$ | $CC_{1/2\text{anom}}$ |
|------------|-------|---------|-----------|--------------|-------------------|----------------------------|------------|-----------------------|
| 7.27       | 2154  | 294     | 309       | 95.10%       | 4.30%             | 41.92                      | 99.70%     | 94%                   |
| 5.14       | 3932  | 564     | 569       | 99.10%       | 4.50%             | 33.69                      | 99.80%     | 89%                   |
| 4.20       | 5213  | 734     | 743       | 98.80%       | 4.50%             | 36.65                      | 99.90%     | 81%                   |
| 3.64       | 5135  | 747     | 860       | 86.90%       | 5.00%             | 34.76                      | 99.80%     | 65%                   |
| 3.25       | 4981  | 847     | 1005      | 84.30%       | 5.50%             | 28.14                      | 99.80%     | 49%                   |

---

|       |       |      |      |        |       |       |        |     |
|-------|-------|------|------|--------|-------|-------|--------|-----|
| 2.97  | 5391  | 846  | 1094 | 77.30% | 6.20% | 24.57 | 99.80% | 60% |
| 2.75  | 5571  | 837  | 1186 | 70.60% | 7.00% | 21.26 | 99.70% | 53% |
| 2.57  | 4589  | 782  | 1283 | 61.00% | 7.80% | 16.83 | 99.50% | 51% |
| 2.42  | 4918  | 785  | 1390 | 56.50% | 8.20% | 16.97 | 99.50% | 50% |
| 2.30  | 4608  | 750  | 1382 | 54.30% | 9.30% | 14.7  | 99.30% | 39% |
| total | 46492 | 7186 | 9821 | 73.20% | 5.60% | 25.62 | 99.80% | 68% |

---

**Table S4** Data processing statistics of 3.3 Å datasets from spherical lysozyme crystals.

50 μm

| $d_{\min}$ | Nrefl | Nunique | Npossible | Completeness | $R_{\text{meas}}$ | $\langle I/\sigma \rangle$ | $CC_{1/2}$ | $CC_{1/2\text{anom}}$ |
|------------|-------|---------|-----------|--------------|-------------------|----------------------------|------------|-----------------------|
| 8.85       | 1105  | 168     | 177       | 94.90%       | 3.70%             | 59.48                      | 99.90%     | 98%                   |
| 6.26       | 2221  | 316     | 317       | 99.70%       | 3.90%             | 50.43                      | 99.90%     | 98%                   |
| 5.11       | 2922  | 395     | 409       | 96.60%       | 3.80%             | 47.69                      | 99.90%     | 97%                   |
| 4.43       | 3038  | 449     | 488       | 92.00%       | 3.30%             | 46.42                      | 99.90%     | 95%                   |
| 3.96       | 2940  | 468     | 553       | 84.60%       | 3.20%             | 47.59                      | 99.90%     | 90%                   |
| 3.61       | 3044  | 463     | 611       | 75.80%       | 3.20%             | 45.94                      | 99.90%     | 89%                   |
| 3.35       | 3061  | 458     | 641       | 71.50%       | 3.40%             | 42.87                      | 99.90%     | 88%                   |
| 3.13       | 2547  | 468     | 733       | 63.80%       | 3.60%             | 35.25                      | 99.90%     | 87%                   |
| 2.95       | 2710  | 442     | 760       | 58.20%       | 4.00%             | 31.64                      | 99.90%     | 87%                   |
| 2.80       | 2639  | 402     | 782       | 51.40%       | 4.60%             | 30.27                      | 99.90%     | 83%                   |
| total      | 26227 | 4029    | 5471      | 73.60%       | 3.50%             | 42.55                      | 99.90%     | 93%                   |

100 μm

| $d_{\min}$ | Nrefl | Nunique | Npossible | Completeness | $R_{\text{meas}}$ | $\langle I/\sigma \rangle$ | $CC_{1/2}$ | $CC_{1/2\text{anom}}$ |
|------------|-------|---------|-----------|--------------|-------------------|----------------------------|------------|-----------------------|
| 8.85       | 1098  | 167     | 177       | 94.40%       | 3.80%             | 62.68                      | 99.80%     | 98%                   |
| 6.26       | 2220  | 316     | 317       | 99.70%       | 3.80%             | 53.95                      | 99.90%     | 98%                   |
| 5.11       | 2935  | 395     | 409       | 96.60%       | 3.50%             | 51.77                      | 99.90%     | 97%                   |
| 4.43       | 3029  | 446     | 486       | 91.80%       | 3.10%             | 50.37                      | 100.00%    | 96%                   |
| 3.96       | 2947  | 470     | 555       | 84.70%       | 3.00%             | 51.3                       | 99.90%     | 91%                   |
| 3.61       | 3057  | 464     | 611       | 75.90%       | 2.90%             | 50.03                      | 99.90%     | 90%                   |
| 3.35       | 3057  | 457     | 640       | 71.40%       | 3.10%             | 47.22                      | 99.90%     | 91%                   |
| 3.13       | 2545  | 467     | 734       | 63.60%       | 3.30%             | 39.08                      | 99.90%     | 88%                   |
| 2.95       | 2709  | 442     | 760       | 58.20%       | 3.60%             | 35.39                      | 99.90%     | 88%                   |
| 2.80       | 2627  | 401     | 782       | 51.30%       | 4.10%             | 34.13                      | 99.90%     | 85%                   |
| total      | 26224 | 4025    | 5471      | 73.60%       | 3.30%             | 46.44                      | 99.90%     | 94%                   |

200 μm

| $d_{\min}$ | Nrefl | Nunique | Npossible | Completeness | $R_{\text{meas}}$ | $\langle I/\sigma \rangle$ | $CC_{1/2}$ | $CC_{1/2\text{anom}}$ |
|------------|-------|---------|-----------|--------------|-------------------|----------------------------|------------|-----------------------|
| 8.85       | 1179  | 166     | 175       | 94.90%       | 5.30%             | 37.45                      | 99.70%     | 95%                   |
| 6.26       | 2263  | 318     | 319       | 99.70%       | 5.50%             | 28.89                      | 99.80%     | 95%                   |
| 5.11       | 2917  | 392     | 406       | 96.60%       | 5.50%             | 26.58                      | 99.80%     | 91%                   |
| 4.43       | 3001  | 444     | 487       | 91.20%       | 5.70%             | 26.1                       | 99.80%     | 86%                   |
| 3.96       | 2892  | 464     | 549       | 84.50%       | 5.70%             | 27.28                      | 99.80%     | 69%                   |

---

|       |       |      |      |        |       |       |        |     |
|-------|-------|------|------|--------|-------|-------|--------|-----|
| 3.61  | 3020  | 466  | 615  | 75.80% | 6.10% | 26.17 | 99.70% | 62% |
| 3.35  | 2906  | 448  | 631  | 71.00% | 7.10% | 23.61 | 99.70% | 62% |
| 3.13  | 2505  | 463  | 733  | 63.20% | 7.00% | 20.06 | 99.70% | 61% |
| 2.95  | 2670  | 434  | 759  | 57.20% | 7.80% | 17.79 | 99.60% | 63% |
| 2.80  | 2577  | 395  | 774  | 51.00% | 8.60% | 16.71 | 99.50% | 59% |
| total | 25930 | 3990 | 5448 | 73.20% | 6.30% | 24.17 | 99.70% | 79% |

---

**Table S5** Data processing statistics of 2.7 Å and 3.3 Å datasets from one spherical lysozyme crystals with matched reflections.

2.7 Å

| $d_{\min}$ | Nrefl | Nunique | Npossible | Completeness | $R_{\text{meas}}$ | $\langle I/\sigma \rangle$ | $CC_{1/2}$ | $CC_{1/2\text{anom}}$ |
|------------|-------|---------|-----------|--------------|-------------------|----------------------------|------------|-----------------------|
| 8.85       | 1096  | 168     | 177       | 94.90%       | 2.50%             | 83.55                      | 99.90%     | 98%                   |
| 6.26       | 1883  | 306     | 319       | 95.90%       | 2.70%             | 63.22                      | 99.90%     | 97%                   |
| 5.11       | 2733  | 395     | 409       | 96.60%       | 2.70%             | 60.68                      | 99.90%     | 95%                   |
| 4.43       | 2884  | 449     | 492       | 91.30%       | 2.50%             | 60.84                      | 100.00%    | 94%                   |
| 3.96       | 2914  | 466     | 549       | 84.90%       | 2.30%             | 64.42                      | 100.00%    | 85%                   |
| 3.61       | 2642  | 449     | 620       | 72.40%       | 2.50%             | 56.98                      | 100.00%    | 85%                   |
| 3.35       | 2520  | 456     | 641       | 71.10%       | 2.90%             | 50.58                      | 99.90%     | 81%                   |
| 3.13       | 2412  | 456     | 743       | 61.40%       | 2.70%             | 44.21                      | 100.00%    | 80%                   |
| 2.95       | 2661  | 435     | 755       | 57.60%       | 3.20%             | 40.11                      | 99.90%     | 81%                   |
| 2.80       | 2636  | 406     | 794       | 51.10%       | 3.60%             | 37.33                      | 99.90%     | 79%                   |
| total      | 24381 | 3986    | 5499      | 72.50%       | 2.70%             | 54.22                      | 100.00%    | 90%                   |

3.3 Å

| $d_{\min}$ | Nrefl | Nunique | Npossible | Completeness | $R_{\text{meas}}$ | $\langle I/\sigma \rangle$ | $CC_{1/2}$ | $CC_{1/2\text{anom}}$ |
|------------|-------|---------|-----------|--------------|-------------------|----------------------------|------------|-----------------------|
| 8.85       | 1092  | 168     | 177       | 94.90%       | 3.60%             | 60.12                      | 99.90%     | 98%                   |
| 6.26       | 1868  | 307     | 317       | 96.80%       | 3.90%             | 47.18                      | 99.90%     | 97%                   |
| 5.11       | 2739  | 395     | 409       | 96.60%       | 3.80%             | 46.53                      | 99.90%     | 97%                   |
| 4.43       | 2898  | 448     | 488       | 91.80%       | 3.30%             | 45.79                      | 99.90%     | 96%                   |
| 3.96       | 2931  | 468     | 553       | 84.60%       | 3.20%             | 48.14                      | 99.90%     | 90%                   |
| 3.61       | 2620  | 442     | 611       | 72.30%       | 3.10%             | 44.03                      | 99.90%     | 89%                   |
| 3.35       | 2550  | 458     | 641       | 71.50%       | 3.30%             | 39.29                      | 99.90%     | 86%                   |
| 3.13       | 2373  | 451     | 733       | 61.50%       | 3.60%             | 35.15                      | 99.90%     | 87%                   |
| 2.95       | 2700  | 442     | 760       | 58.20%       | 4.00%             | 31.8                       | 99.90%     | 86%                   |
| 2.80       | 2635  | 404     | 784       | 51.50%       | 4.60%             | 30.39                      | 99.90%     | 83%                   |
| total      | 24406 | 3983    | 5473      | 72.80%       | 3.50%             | 41.59                      | 99.90%     | 93%                   |



**Table S6** Absorption corrected intensities and their ratios for spheres of 25, 50, and 100  $\mu\text{m}$  radii respectively as calculated based on Eq. 5 and 6.

| r ( $\mu\text{m}$ )                       | 25               | 50          | 100         |
|-------------------------------------------|------------------|-------------|-------------|
| $I_0, b = 50$ ( $\mu\text{m}$ )           | $\pi/4 = 0.7854$ | 1           | 1           |
| $I_0, b = 40$ ( $\mu\text{m}$ )           | 0.9716           | 1           | 1           |
| $V_{\text{xtal } b=40}$ ( $\mu\text{m}$ ) | 58119            | 151120      | 315693      |
| $\lambda$ ( $\text{\AA}$ ) = 2.7          |                  |             |             |
| $\langle A(30^\circ) \rangle$             | 0.781705         | 0.558215    | 0.296942    |
| $I(30^\circ)$                             | 44142            | 84355.2     | 93742.3     |
| <b>Ratio[30<sup>0</sup>]</b> *            | <b>1.0</b>       | <b>1.91</b> | <b>2.12</b> |
| <b>Expt Measured ratio</b>                | <b>1.0</b>       | <b>~2.0</b> | <b>~1.9</b> |
| $\lambda$ ( $\text{\AA}$ ) = 3.3          |                  |             |             |
| $\langle A(30^\circ) \rangle$             | 0.639616         | 0.345691    | 0.109369    |
| $I(30^\circ)$                             | 36118.4          | 52239.4     | 34527.0     |
| <b>Ratio[30<sup>0</sup>]</b>              | <b>1.0</b>       | <b>1.45</b> | <b>0.95</b> |
| <b>Expt. Measured ratio</b>               | <b>1</b>         | <b>~1.5</b> | <b>~0.7</b> |

\* The ratios are very similar in the  $2\theta$  range of 0 to  $30^\circ$ .

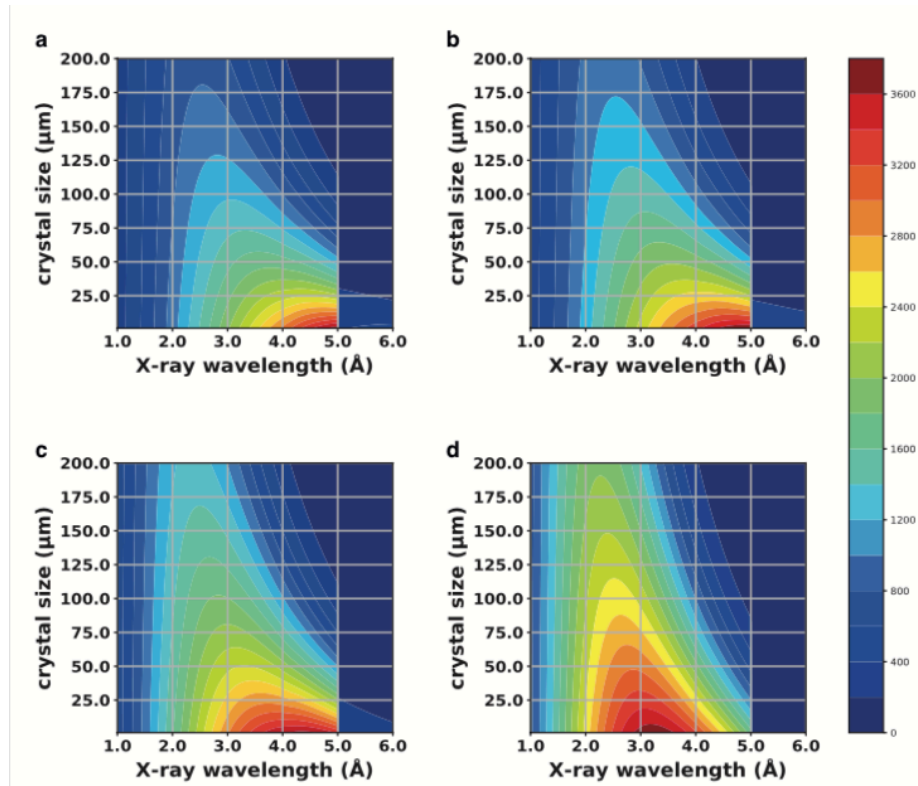

**Figure S1 2-D contour plots of theoretical anomalous diffraction efficiency for sulfur atom as a function of X-ray wavelengths (X-axis) and crystal sizes (Y-axis).** All plots assumed absence of air in the diffracted X-ray beam path. The X-ray absorption effect of various solvent thicknesses – **a.** 5  $\mu\text{m}$ , **b.** 10  $\mu\text{m}$ , **c.** 20  $\mu\text{m}$ , and **d.** 50  $\mu\text{m}$  are displayed.

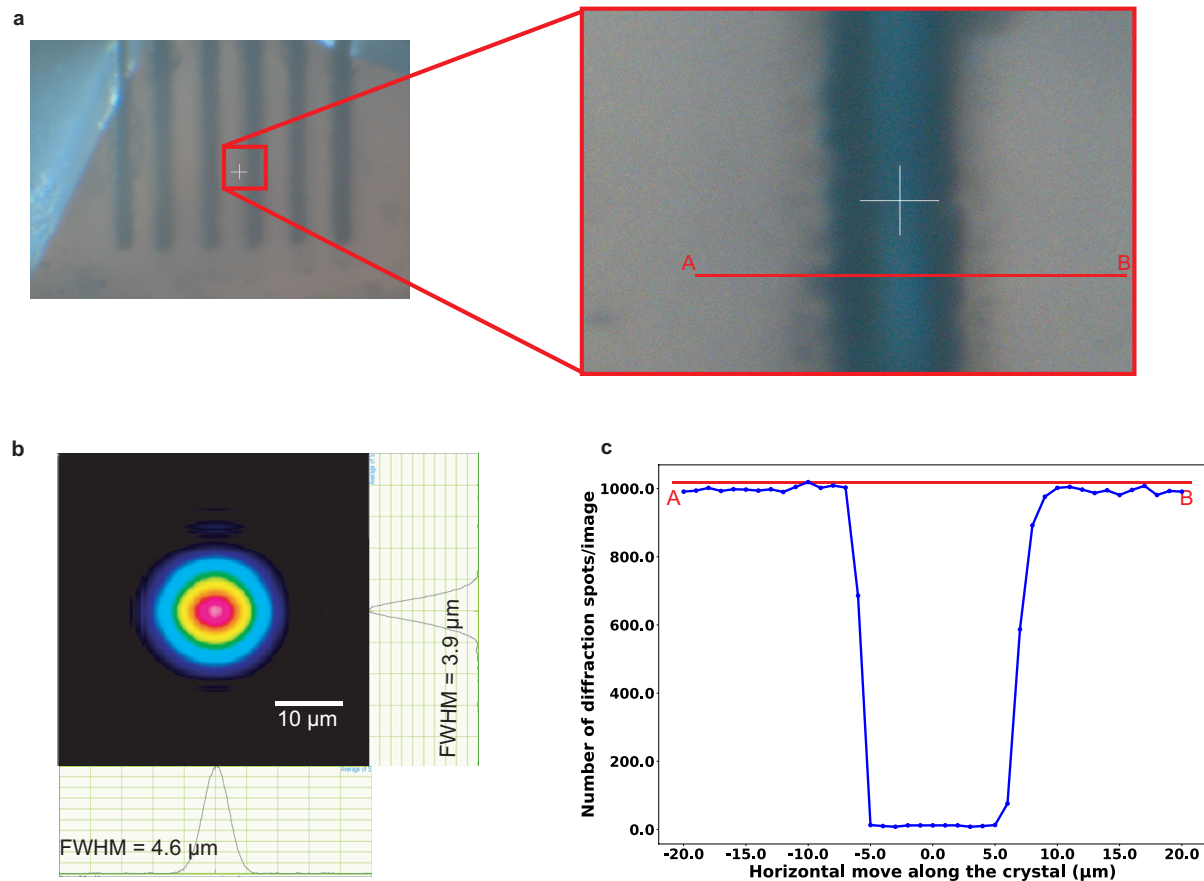

**Figure S2 Evaluation of irradiated damage due to deep-UV laser-shaping on a cytochrome-c-oxidase crystal. a.** On-axis view of the crystal, which is shaped into vertical lines using deep-UV laser system. The zoomed-in view shows how the line-shaped crystal was rastered from point A to B using a horizontal line (red). **b.** The 2D Gaussian beam profile for the deep-UV laser with a scale-bar (white). **c.** A plot, representing the decay of diffraction as the crystal is being rastered horizontally from A to B position (shown as red line) with Y-axis referring to the number of diffraction spots per image and X-axis referring to horizontal move of the crystal in  $\mu\text{m}$ .

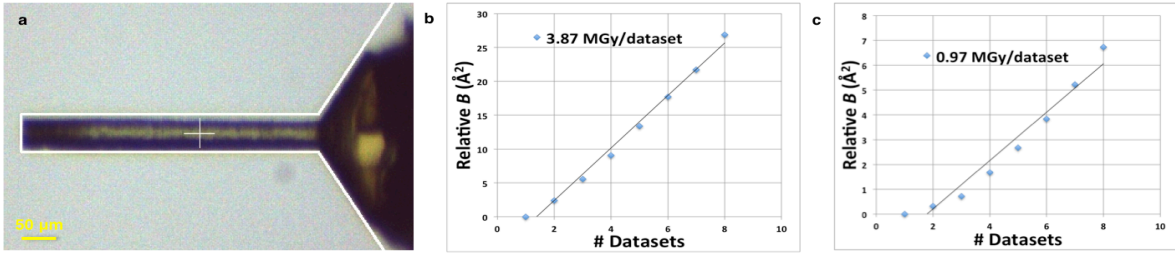

**Figure S3 Measurement and estimation of dose normalization on cylindrically laser-shaped lysozyme crystal.** **a.** Lysozyme crystal, shaped into 50 μm thick cylinder using a deep-UV laser. This crystal was used for dose estimation at 2.7 and 3.3 Å wavelengths, respectively. **b.** Relative  $B$  factors against no. of datasets at 2.7 Å wavelength with a linear curve-fitting (black line). **c.** Relative  $B$  factors against no. of datasets at 3.3 Å wavelength with a linear curve-fitting (black line).

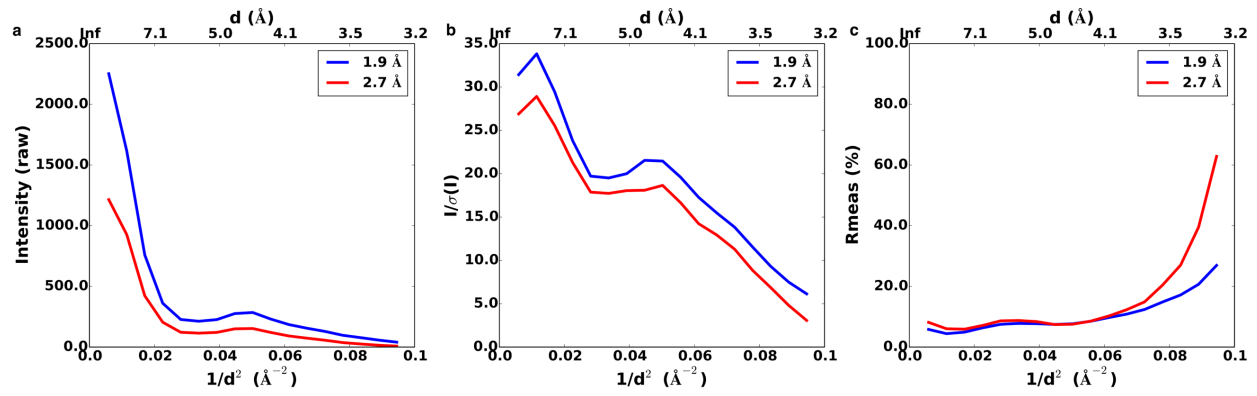

**Figure S4 Comparison of statistics from a 360° dataset collected at 1.9 and 2.7 Å wavelength on a T<sub>2</sub>R-TTL crystal. a. Observed diffracted intensities, b.  $I/\sigma(I)$  values, and c.  $R_{\text{meas}}$  values.**

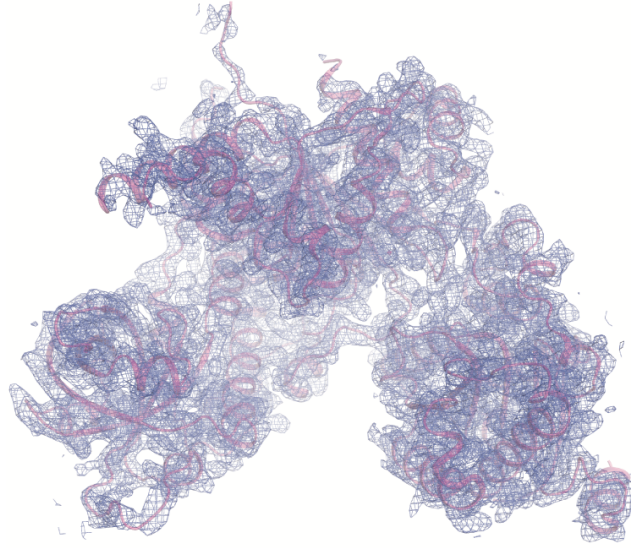

**Figure S5 Experimental phasing map of Sen1.** Experimental phasing map after density modification (shown in blue), contoured at  $2.0 \sigma$  along with C- $\alpha$  trace.

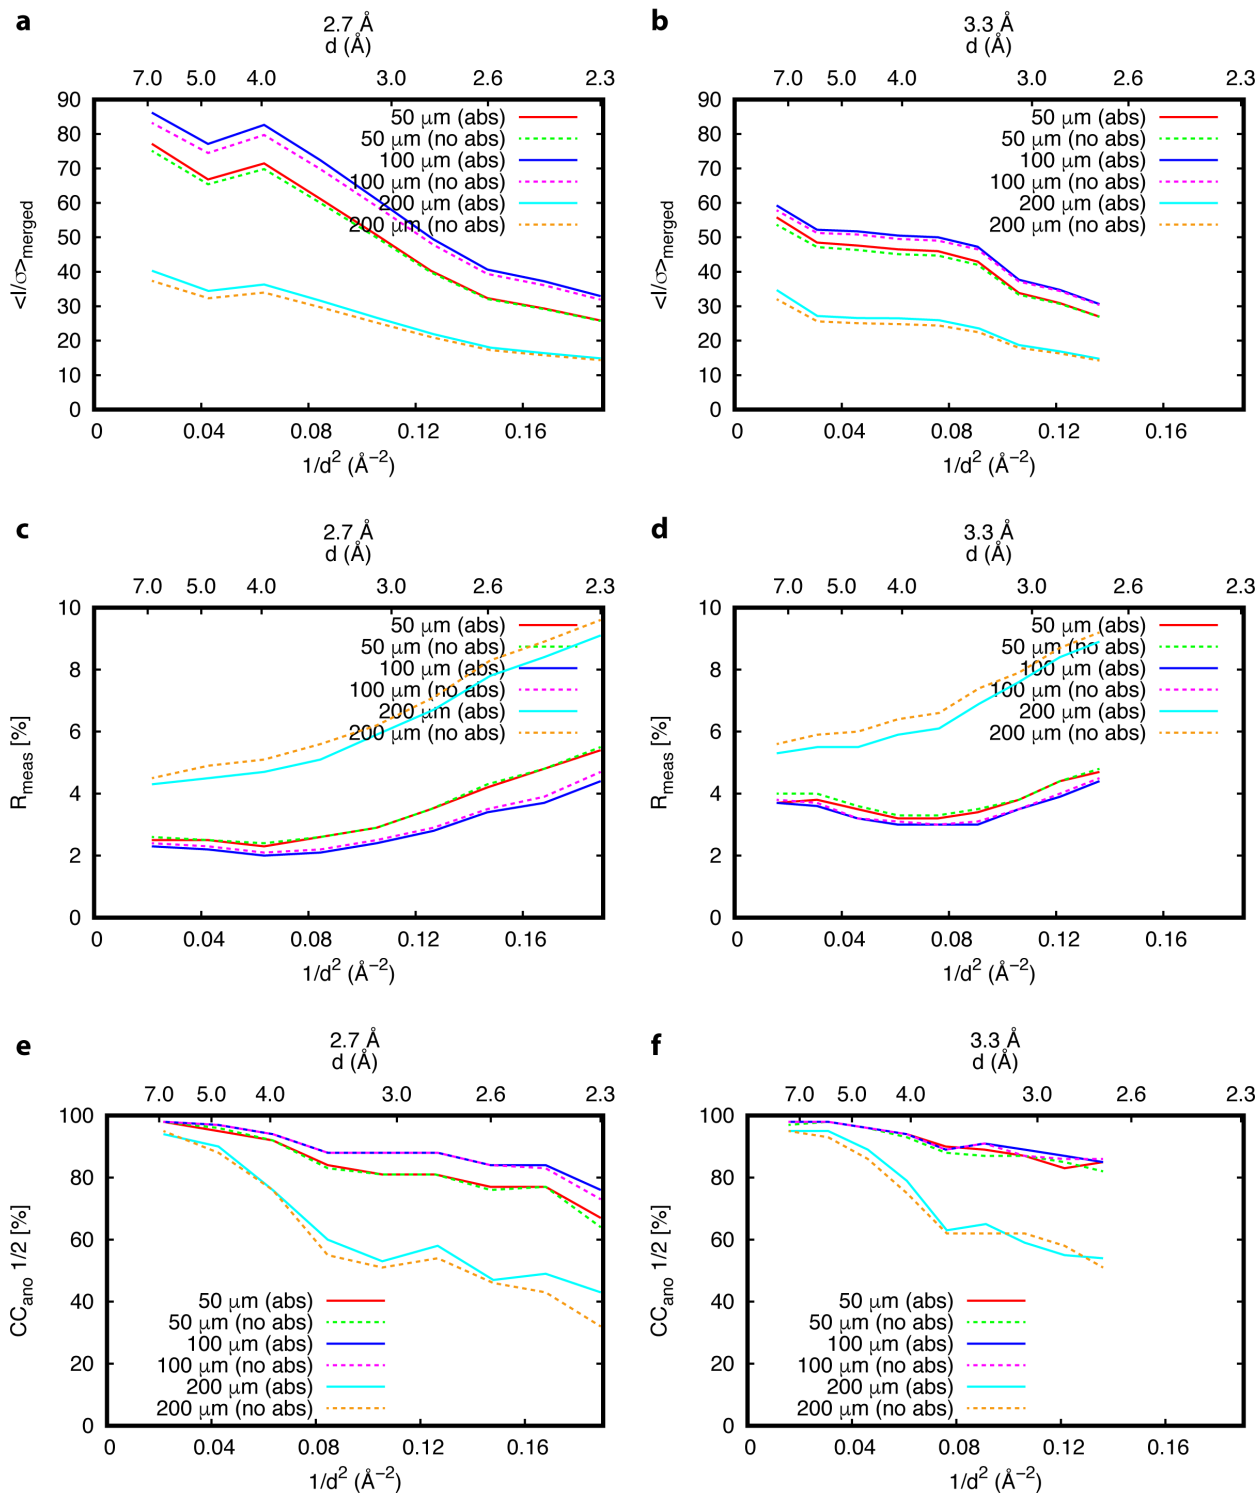

**Figure S6 Data processing statistics with and without absorption correction from spherical lysozyme crystals.**

**a**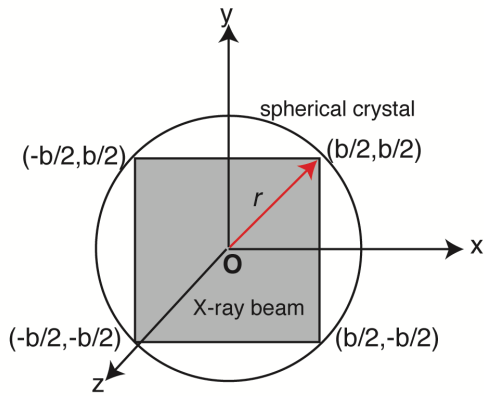

**On-axis view along  
X-ray direction**

**b**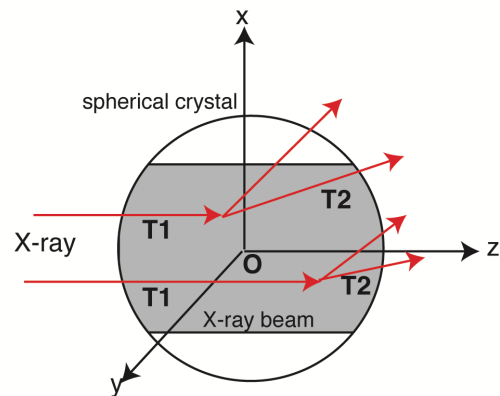

**Off-axis side view  
perpendicular to  
X-ray direction**

**Figure S7 Geometrical representation of X-ray illuminated region with absorption paths on a spherical crystal.** X-ray beam has a square projection (shown in gray) of length  $b$ . The origin of the coordinate system is at the center of the spherical crystal. The radius of spherical crystal is shown as  $r$ . **a.** On-axis view along the direction of X-ray beam. **b.** Off-axis side view, depicting the X-ray path through the crystal. T1 is the X-ray path length up to the point of interaction inside the crystal and T2 is the path length of the diffracted beam, which is from intersection point to exit point of the spherical crystal. T1 and T2 paths - both are shown in red colour.



## Absorption correction script in Mathematica

```
r = 25; *radius of the spherical crystal*
b = 40; *X-ray beam size*
erx = 0.0; ery = 0.0; *erx and ery allow to simulate off center beam position*
I0 = 0.9716;
a = 0.32*10^-3;
xray = 3.3; *X-ray wavelength in Angstrom*
mu = a*(xray)^3; *linear absorption coefficient*

*Volume of a sphere calculation*
Volsphere = (4*Pi*r^3)/3;
*check if a point is inside or outside spherical crystal*
inSphere[x_, y_, z_] := If[x^2 + y^2 + z^2 > r^2, 0, 1]

*function to calculate intersection between a line and sphere*
intersection[o_, l_, dir_] := -Dot[o, l] + dir*Sqrt[Dot[o, l]^2 - Norm[o]^2 + r^2]

*see https://en.wikipedia.org/wiki/Line-sphere_intersection *
*T1 calculation: beam path inside the sphere up to the intersection point*
t1[x_, y_, z_] := -intersection[{x, y, z}, {0, 0, 1}, -1]
*T2 calculation: beam path from intersection point to the exit point of the sphere*
t2[x_, y_, z_, alpha_, phi_] := intersection[{x, y, z}, {Sin[alpha]*Cos[phi], Sin[alpha]*Sin[phi], Cos[alpha]}, 1]

*Total absorption path length = T1+T2*
path[x_, y_, z_, alpha_, phi_] := t1[x, y, z] + t2[x, y, z, alpha, phi]

Absorp[x_, y_, z_, alpha_, phi_] := Exp[-mu*path[x, y, z, alpha, phi]]

*Numerical integration to calculate illuminated volume due to X-ray and sphere interaction*
V = NIntegrate[inSphere[x, y, z], {z, -r, r}, {y, (-b/2.0) - ery, (b/2.0) - ery}, {x, (-b/2.0) + erx, (b/2.0) + erx}]

AbsInt[alpha_] := NIntegrate[inSphere[x, y, z]*Absorp[x, y, z, alpha, phi], {z, -r, r}, {y, (-b/2.0) - ery, (b/2.0) - ery}, {x, (-b/2.0) + erx, (b/2.0) + erx}, {phi, 0, Pi*2}]

PathAbsCorrInt[alpha_] := NIntegrate[inSphere[x, y, z]*path[x, y, z, alpha, phi]*
Absorp[x, y, z, alpha, phi], {z, -r, r}, {y, (-b/2.0) - ery, (b/2.0) - ery}, {x, (-b/2.0) + erx, (b/2.0) + erx}, {phi, 0, Pi*2}];

PathInt[alpha_] := NIntegrate[inSphere[x, y, z]*path[x, y, z, alpha, phi], {z, -r, r}, {y, (-b/2.0) + ery, (b/2.0) + ery}, {x, (-b/2.0) + erx, (b/2.0) + erx}, {phi, 0, Pi*2}];

T = PathAbsCorrInt[30*Pi/180.0]/AbsInt[30*Pi/180.0];

A = AbsInt[0*Pi/180]/(V*2*Pi);
Icorr = I0*V*A;
```

**Supplementary Movie S1.** Demonstration of the shaping procedure on a lysozyme crystal into different diameters of spheres using a deep-UV laser system.
